# Supplementary material for: Hematopoietic Stem and Progenitor Cell Maintenance and Multiple Lineage Differentiation Is an Integral Function of NFATc1
Source: MDPI journal article supplement (doi:10.3390/cells11132012), 2022-06-23
Supplement: s1 [file s1]

## **SUPPLEMENTARY MATERIALS**

### **Hematopoietic stem and progenitor cell maintenance and multiple lineage differentiation is an integral function of NFATc1**

**Carlotta Barahona de Brito<sup>1,2</sup>, Stefan Klein-Hessling<sup>3</sup>, Edgar Serfling<sup>3,4</sup> & Amiya Kumar Patra<sup>1</sup>**

<sup>1</sup>Peninsula Medical School, University of Plymouth, Plymouth PL6 8BU, UK.

<sup>2</sup>Department of Biology and Biochemistry, University of Bath, Bath BA2 7AX, UK.

<sup>3</sup>Department of Molecular Pathology, Institute of Pathology, University of Würzburg, Josef Schneider-Str. 2, 97080 Würzburg, Germany, and

<sup>4</sup>Comprehensive Cancer Center Mainfranken, University of Würzburg, Josef Schneider-Str. 6, 97080 Würzburg, Germany.

**Key words:** Hematopoiesis, HSC, Lineage differentiation, and NFATc1

**Running title:** NFATc1 regulates hematopoiesis

**Total number of figures:** 6

Reprint requests and page proofs should be addressed to:

Dr. Amiya K. Patra  
Peninsula Medical School  
University of Plymouth,  
Plymouth Science Park, Research Way  
Plymouth PL6 8BU  
United Kingdom.

Tel.: + 44 1752 437433

E. mail: [amiya.patra@plymouth.ac.uk](mailto:amiya.patra@plymouth.ac.uk)

## SUPPLEMENTARY FIGURE LEGENDS

**Supplementary Figure 1.** (a) Flow cytometry profile showing the gating strategy for identification of BM Lin<sup>-</sup>Sca1<sup>+</sup>c-Kit<sup>+</sup> (LSK), Lin<sup>-</sup>Sca1<sup>+</sup>c-Kit<sup>-</sup> (Sca1<sup>+</sup>), Lin<sup>-</sup>Sca1<sup>-</sup>c-Kit<sup>+</sup> (c-Kit<sup>+</sup>) and Lin<sup>-</sup>Sca1<sup>-</sup>c-Kit<sup>-</sup> (L<sup>-</sup>S<sup>-</sup>K<sup>-</sup>) cells from WT mice. (b) Immunofluorescence analysis for nuclear NFATc1 levels in sorted LSK, Sca1<sup>+</sup>, and c-Kit<sup>+</sup> cells from WT mice. Co-staining with DAPI confirms nuclear NFATc1. Scale bar, 10  $\mu$ m. Data are representative of three independent experiments.

**Supplementary Figure 2.** GFP levels representing NFATc1 expression in myeloid and erythroid cell populations from spleen and BM of *Nfatc1-eGfp-Bac* tg reporter mice compared to WT mice. Numbers inside each histogram represent mean fluorescent intensity (MFI). Data are representative of three independent experiments.

**Supplementary Figure 3.** (a) Flow cytometry profiles showing the distribution of CD11b<sup>+</sup> and CD11c<sup>+</sup> cells in the BM of *Nfatc2*<sup>-/-</sup> and *Nfatc3*<sup>-/-</sup> mice compared to littermate WT mice. (b) Quantification of percent CD11b<sup>+</sup> cells distribution in the BM of *Nfatc2*<sup>-/-</sup>, *Nfatc3*<sup>-/-</sup> mice ( $n = 3$  each) and WT ( $n = 5$ ) littermates. (c) Distribution of CD11b<sup>+</sup> and Gr1<sup>+</sup> cells in the BM of *Nfatc2*<sup>-/-</sup> and *Nfatc3*<sup>-/-</sup> mice compared to littermate WT mice as revealed by flow cytometry. (d) Quantification of percent Gr1<sup>+</sup> cells distribution in the BM of *Nfatc2*<sup>-/-</sup>, *Nfatc3*<sup>-/-</sup> mice ( $n = 3$  each) and WT ( $n = 5$ ) littermates. Numbers inside each dot plot represent percent respective populations (ns = not significant; one-way ANOVA).

**Supplementary Figure 4.** (a) Flow cytometry analysis of GFP expression representing NFATc1 levels in BM Lin<sup>-</sup>Sca1<sup>+</sup>c-Kit<sup>-</sup> and Lin<sup>-</sup>Sca1<sup>-</sup>c-Kit<sup>+</sup> cells from *Il2*<sup>-/-</sup>*Nfatc1-eGfp-Bac* tg reporter mice compared to *Nfatc1-eGfp-Bac* tg mice. Wild-type mice were used as

negative control. (b) Analysis of various integrins (CD62L, CD11a, CD18 and CD49d) expression on HSCs from WT mice.

**Supplementary Table S1**  
**LIST OF RT-PCR PRIMERS**

| Gene                       | Primer Sequence                                                                | Product Size |
|----------------------------|--------------------------------------------------------------------------------|--------------|
| <i>Actb</i>                | For: 5'- CCAGGTCATCACTATTGGCAAGGA -3'<br>Rev: 5'- GAGCAGTAATCTCCTTCTGCATCC -3' | 223 bp       |
| <i>Cebpa</i>               | For: 5'- CGCTGGTGATCAAACAAGAG -3'<br>Rev: 5'- TCACTGGTCAACTCCAGCAC -3'         | 499 bp       |
| <i>cMyc</i>                | For: 5'- CATCCTGTCCATTCAAGC -3'<br>Rev: 5'- TAATTCCAGCGCATCAGT -3'             | 200 bp       |
| <i>Csf1</i>                | For: 5'- AGTCTGTCTTCCACCTGCTG -3'<br>Rev: 5'- TGGTAGTGGTAGGCCACATT -3'         | 299 bp       |
| <i>Egr2</i>                | For: 5'- CTCCCATCTCTGCACCTAGA -3'<br>Rev: 5'- ATAAGGAGGAGGAGGTGGTG -3'         | 284 bp       |
| <i>Flk2</i>                | For: 5'- GACAAATCTCCCAATTGCAC -3'<br>Rev: 5'- GTGGCAGATCAACACAATGA -3'         | 291 bp       |
| <i>Fog1</i>                | For: 5'- ATCCAGTCAGGGTGAAGACA -3'<br>Rev: 5'- AGGTGATCTCGCACTCAAAG -3'         | 291 bp       |
| <i>Csf3r (Gcsfr)</i>       | For: 5'- AACTACACCCAGGCCTTCCT -3'<br>Rev: 5'- GAGCTCAAACCTGGTCCTTGC -3'        | 606 bp       |
| <i>Mmp9 (Gelatinase B)</i> | For: 5'- CGTCGTGATCCCCACTTACT -3'<br>Rev: 5'- AGAGTACTGCTTGCCCAGGA -3'         | 433 bp       |
| <i>Gfi1</i>                | For: 5'- GAGCTTCAAGAGGTCATCCA -3'<br>Rev: 5'- AGTCCATGCTGAGTCTCTCG -3'         | 306 bp       |
| <i>Hax1</i>                | For: 5'- GATGACGACGATGATGATGA -3'<br>Rev: 5'- CTGGGTTGGTGACTATCTGG -3'         | 330 bp       |
| <i>HoxA9</i>               | For: 5'- TCACCAACCAAACACAACAG-3'<br>Rev: 5'- CACAATTAATCACGCCATCA-3'           | 299 bp       |
| <i>Icam1</i>               | For: 5'-CCAAGAAACGCTGACTTCAT-3'<br>Rev: 5'- CGACCCTTATGAGAAAAGCA-3'            | 327 bp       |
| <i>Icam2</i>               | For: 5'- GAAGCCACAGAGTCTTGGA-3'<br>Rev: 5'- TCAGTGTGACTTGAGCTGGA-3'            | 244 bp       |
| <i>Il3ra</i>               | For: 5'-GCCCTGCATGGACAACACT-3'<br>Rev: 5'-GCACCGTAGCCACTGAAGTCA-3'             | 423 bp       |
| <i>Itga4</i>               | For: 5'- AAGCCAGCGTTCATATTCAG-3'<br>Rev: 5'- ATCCAGCCTTCCACATAACA-3'           | 277 bp       |
| <i>Itga6</i>               | For: 5'-TGAGGTGTGTGAACATCAGG-3'<br>Rev: 5'-TAGAGCCAGCATCAGAATCC-3'             | 301 bp       |
| <i>Itgav</i>               | For: 5'- GGAGAACCAGAACCATTCT-3'<br>Rev: 5'- TTGCTCTTCTTGAGGTGGTC-3'            | 272 bp       |
| <i>Itgb1</i>               | For: 5'- AAGACATGGACGCTTACTGC-3'<br>Rev: 5'- ATGGACCAGTGTCCAAAGAA-3'           | 267 bp       |
| <i>Itgb2</i>               | For: 5'- TAATGCAAGTTGCTGCATGT-3'<br>Rev: 5'- GCTGGAGTCGTCAGACAGTT-3'           | 332 bp       |

|                                        |                                                                            |        |
|----------------------------------------|----------------------------------------------------------------------------|--------|
| <i>Itgb3</i>                           | For: 5'-ATACCAGGGAGGACCTTCAG-3'<br>Rev: 5'-TCCTTCCCTGCTAGTTTCCT-3'         | 257bp  |
| <i>Lef1</i>                            | For: 5'- CCAGACTGTCTCCACAGCTT-3'<br>Rev: 5'- TGACAGGTCAGCACAGAAGA-3'       | 288 bp |
| <i>Lyzs (Lysozyme)</i>                 | For: 5'- ACTGCTCAGGCCAAGGTCTA-3'<br>Rev: 5'- GCCCTGTTTCTGCTGAAGTC-3'       | 524 bp |
| <i>Csf1r (Mcsfr)</i>                   | For: 5'-ATGAGTCCCTCTTCACTCCG-3'<br>Rev: 5'-ACCTTCAGCACTGCATCTTC-3'         | 306 bp |
| <i>Meis1</i>                           | For: 5'- AATGCCTATCGATTTGGTGA-3'<br>Rev: 5'- CCTTATCAGGGTCATCATCG-3'       | 266 bp |
| <i>Mpl</i>                             | For: 5'- GAAATCTGCCTGCTGTGACT-3'<br>Rev: 5'- GAACCAGGAAGGAAGGTGAT-3'       | 254 bp |
| <i>(Mpo)</i><br><i>Myeloperoxidase</i> | For: 5'-ATGCAGTGGGGACAGTTTCTG-3'<br>Rev: 5'-GTCGTTGTAAGATCGGTACTG-3'       | 696 bp |
| <i>Nfatc1</i>                          | For: 5'-GACTTCGATTTCTCTTCGAGTTC-3'<br>Rev: 5'-CTCGATTCTCGGACTCTCCAG-3'     | 297 bp |
| <i>Nfatc1a</i>                         | For: 5'- GGGAGCGGAGAACTTTGC -3'<br>Rev: 5'- GATCTCGATTCTCGGACTCTCC -3'     | 319 bp |
| <i>Nfatc1b</i>                         | For: 5'-CGACTTCGATTTCTCTTCGAG -3'<br>Rev: 5'- GATCTCGATTCTCGGACTCTCC-3'    | 311 bp |
| <i>Nfatc2</i>                          | For: 5'-GGGTTCGGTGAGTGACAGTT-3'<br>Rev: 5'-CTCCTTGGCTGTTTGGGATA-3'         | 371 bp |
| <i>Nfatc3</i>                          | For: 5'-CCGATGACTACTGCAAACCTGTGG-3'<br>Rev: 5'-TTTGAATACTTGGGCACTCAAAGG-3' | 343 bp |
| <i>Trp53 (P53)</i>                     | For: 5'-CAGGGCTGAGACACAATC-3'<br>Rev: 5'-TGGGGTAGGGTGAGATTT-3'             | 201 bp |
| <i>Pbx1</i>                            | For: 5'- AAAGTCCACAGAATGAAGC-3'<br>Rev: 5'- CTTCTCCAGCTCTGTGTGGT-3'        | 298 bp |
| <i>Pde4a</i>                           | For: 5'- CACAGCCTCTGTGGAGAAGT -3'<br>Rev: 5'- GGAGAGTTTCCTCAGTGCAA -3'     | 305 bp |
| <i>Pde4b</i>                           | For: 5'- CCAGCTAGAGACCATCCAGA -3'<br>Rev: 5'- GAAGATGTTAAGGCCCCATT -3'     | 367 bp |
| <i>Pecam1</i>                          | For: 5'- TTGGCACAACAACAAGCTA-3'<br>Rev: 5'- GAAATCTTCTCGCTGTTGGA-3'        | 292 bp |
| <i>Sell</i>                            | For: 5'-CGCTCATTCATCCCATTAAC-3'<br>Rev: 5'-GCAAGGAGTCTGAGTTTCCA-3'         | 224 bp |
| <i>Selp</i>                            | For: 5'- TCTTGGGAATTCCACCTACA-3'<br>Rev: 5'- GGGCAGGAAGTGATGTTATG-3'       | 339 bp |
| <i>Sfp1 (Pu.1)</i>                     | For: 5'-CGGATGACTTGGTTACTTACG-3'<br>Rev: 5'-GTAGGAAACCTGGTGACTGAG-3'       | 292 bp |
| <i>Slamf1</i>                          | For: 5'-TCCATGCCTCAGTTTCTCTC-3'<br>Rev: 5'-GGCAACTTTACAGCAGCATT-3'         | 264 bp |
| <i>Vcam1</i>                           | For: 5'-CTGTACATCCCTCCACAAGG-3'<br>Rev: 5'-ACACGTCAGAACAACCGAAT-3'         | 321 bp |
