# Supplementary figures and images for: Hematopoietic Stem and Progenitor Cell Maintenance and Multiple Lineage Differentiation Is an Integral Function of NFATc1
Source: MDPI journal article supplement (doi:10.3390/cells11132012), 2022-06-23

Supplementary Figure S2

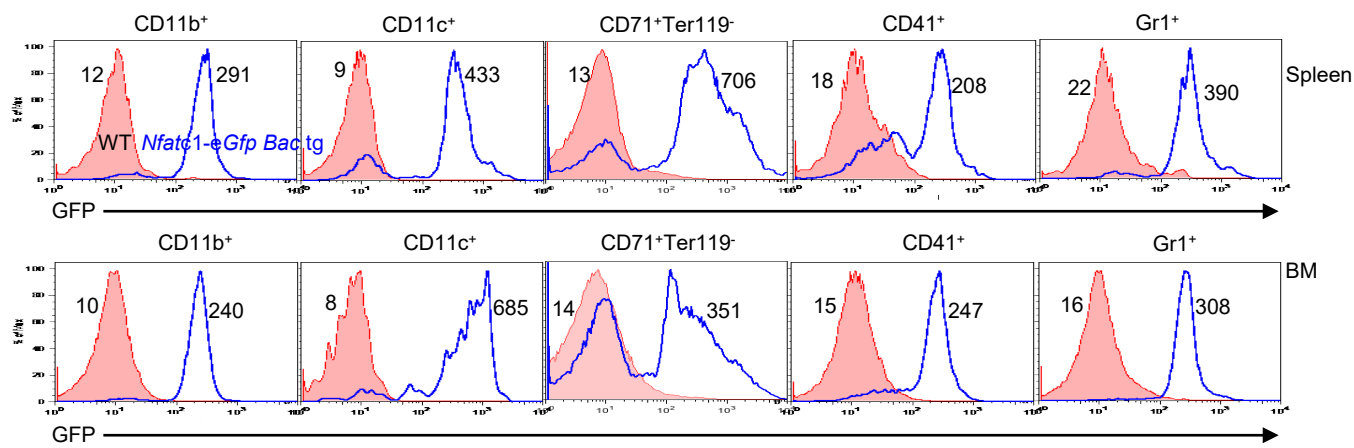

Supplement: s1 [file s1]

# Supplementary Figure S1

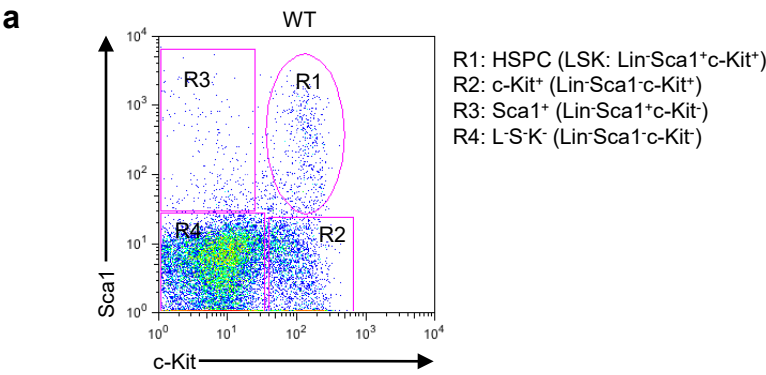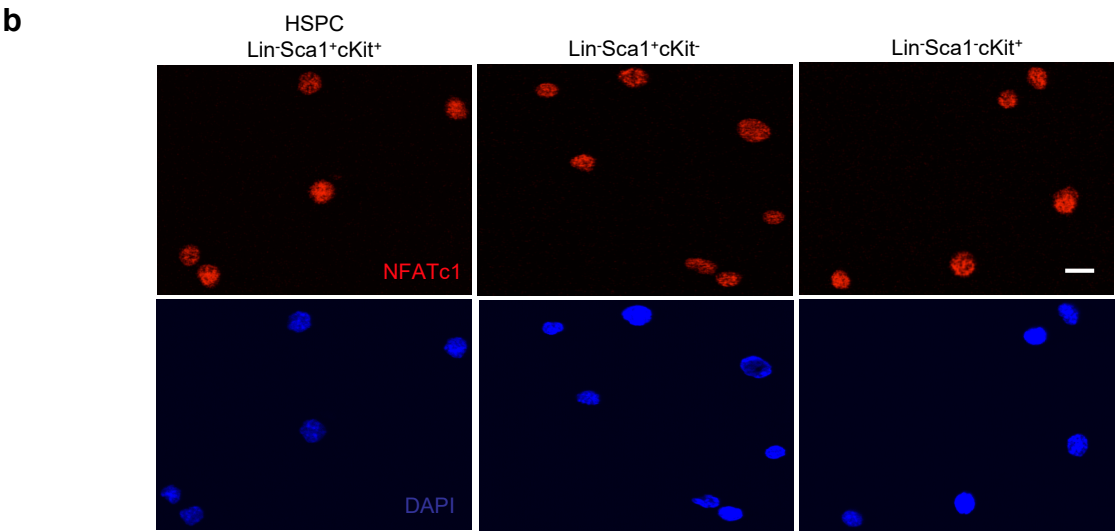

Supplement: s1 [file s1]

# Supplementary Figure S3

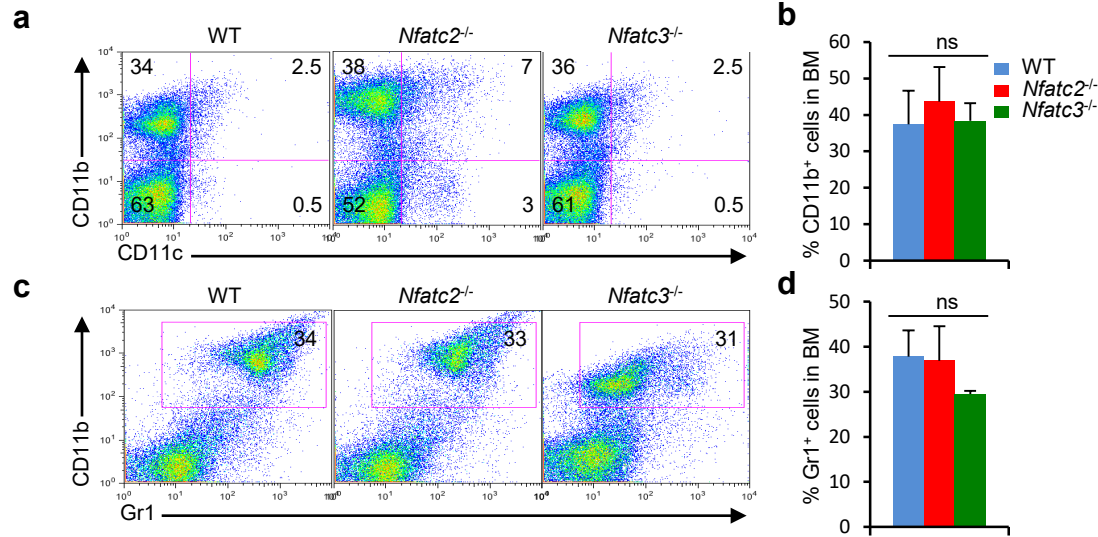

Supplement: s1 [file s1]

# Supplementary Figure S4

**a**

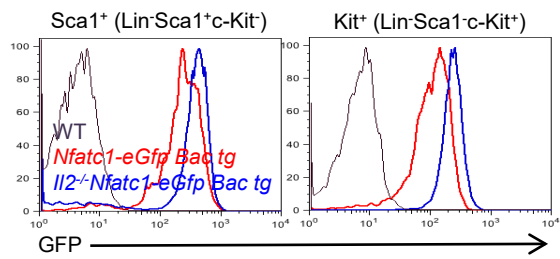

**b**

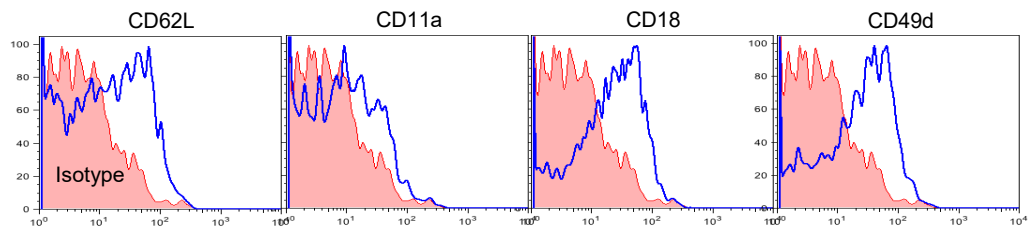

Supplement: s1 [file s1]
